# Supplementary material for: Proteostasis is differentially modulated by inhibition of translation initiation or elongation
Source: eLife journal article supplement (doi:10.7554/elife.76465), 2023-10-05

Figure 1A - source data

Repeat 1    Original picture

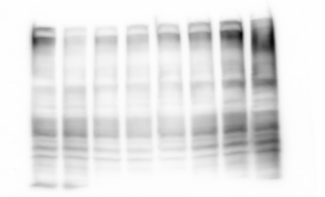

Original picture

Labelled picture

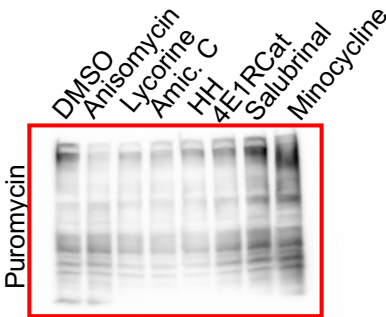

Labelled picture

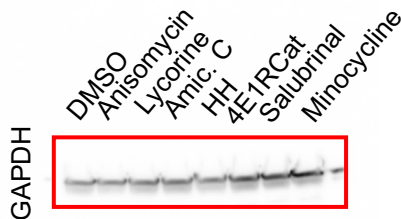

Repeat 2    Original picture

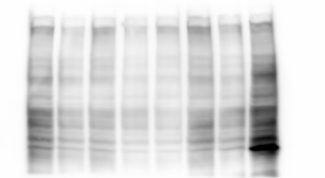

Original picture

Labelled picture

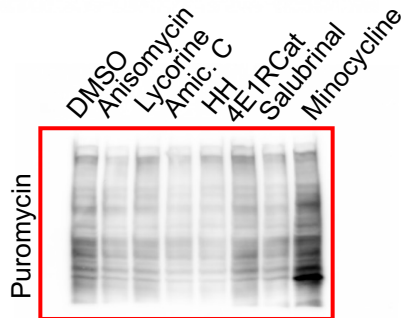

Labelled picture

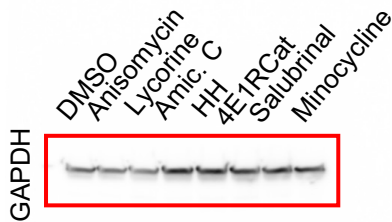

Repeat 3    Original picture

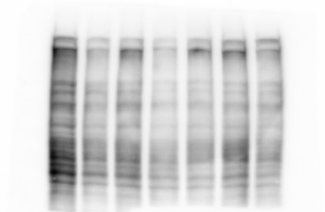

Original picture

Labelled picture

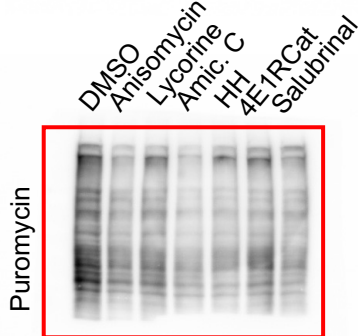

Labelled picture

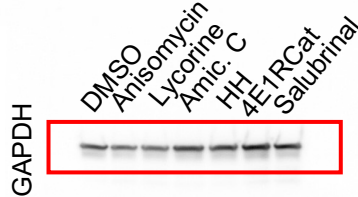

Supplement: fig1-data1 [file elife-76465-fig1-data1-v2.zip]
