# Supplementary material for: Proteostasis is differentially modulated by inhibition of translation initiation or elongation
Source: eLife journal article supplement (doi:10.7554/elife.76465), 2023-10-05

Figure 2D - source data

Repeat 1 Original picture

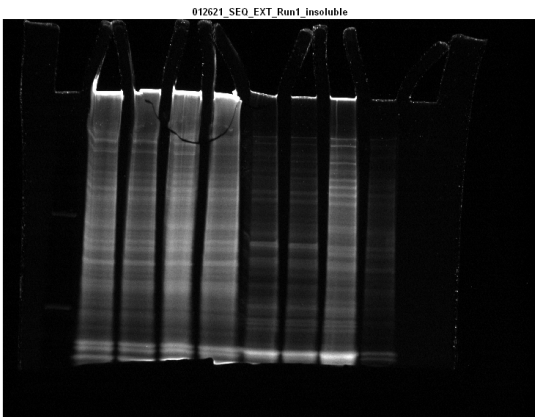

Labelled picture

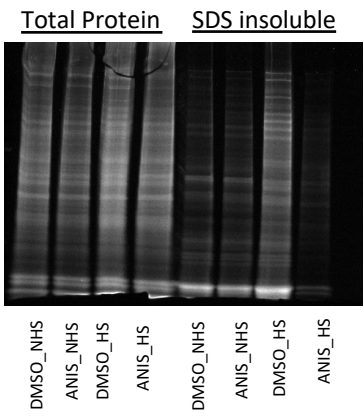

Repeat 2 Original picture

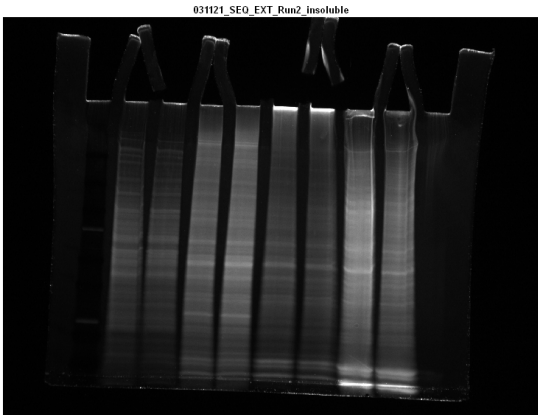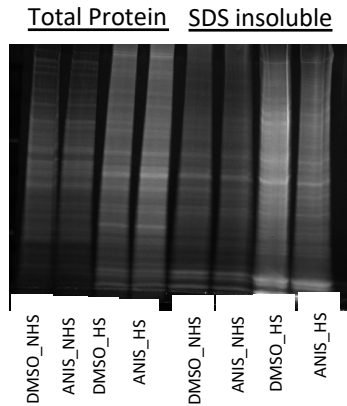

Repeat 3 Original picture

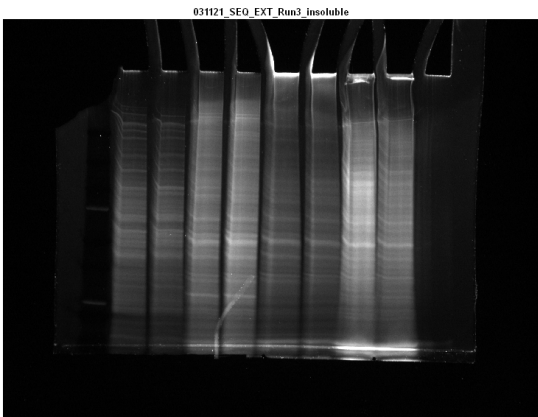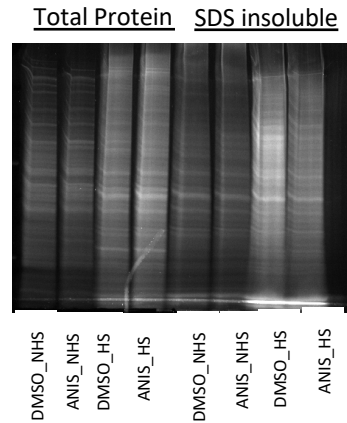

Repeat 4 Original picture

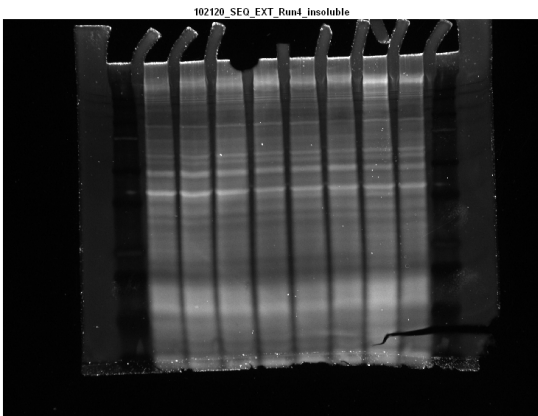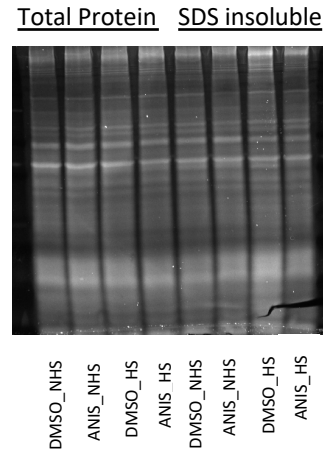

Supplement: fig2-data4 [file elife-76465-fig2-data4-v2.zip]
