# Supplementary material for: Proteostasis is differentially modulated by inhibition of translation initiation or elongation
Source: eLife journal article supplement (doi:10.7554/elife.76465), 2023-10-05
Supplement: fig5-data1 [file Figure 5A_source_data.xlsx]

## Sheet: Sheet1
Id_number	Strain	Drug	Concentration (uM)	Percent Increase	pValue	Average Lifespan	Number of animals	Day of adulthood added	Experiment Date
1	N2	2DMSO	0	0		17.4	65	Day1	70821
2	N2	Salubrinal	3	28	7.75e-05	22.19	31	Day1	70821
3	N2	Salubrinal	10	28	8.16e-06	22.31	52	Day1	70821
4	N2	Salubrinal	33	42	1.74e-07	24.73	33	Day1	70821
5	N2	Salubrinal	50	37	9.62e-07	23.79	57	Day1	70821
6	N2	Salubrinal	100	38	4.39e-08	23.98	64	Day1	70821
7	hsf-1(sy441)	2DMSO	0	0		11.08	76	Day1	70821
8	hsf-1(sy441)	Salubrinal	3	3	0.588865	11.45	55	Day1	70821
9	hsf-1(sy441)	Salubrinal	10	7	0.3425	11.88	52	Day1	70821
10	hsf-1(sy441)	Salubrinal	33	5	0.370211	11.63	52	Day1	70821
11	hsf-1(sy441)	Salubrinal	50	10	0.21843	12.14	59	Day1	70821
12	hsf-1(sy441)	Salubrinal	100	-1	0.994566	11	51	Day1	70821
13	N2	1DMSO	0	0		17.52	64	Day1	70821
14	N2	Lycorine	3	10	0.11221	19.19	37	Day1	70821
15	N2	Lycorine	10	3	0.816785	18.05	56	Day1	70821
16	N2	Lycorine	33	2	0.94953	17.87	45	Day1	70821
17	N2	Lycorine	50	1	0.958985	17.62	60	Day1	70821
18	N2	Lycorine	100	3	0.388319	17.96	54	Day1	70821
19	hsf-1(sy441)	1DMSO	0	0		10.27	60	Day1	70821
20	hsf-1(sy441)	Lycorine	3	24	0.0037054	12.7	43	Day1	70821
21	hsf-1(sy441)	Lycorine	10	25	0.0007356	12.84	57	Day1	70821
22	hsf-1(sy441)	Lycorine	33	17	0.0268816	11.97	62	Day1	70821
23	hsf-1(sy441)	Lycorine	50	13	0.0656569	11.59	63	Day1	70821
24	hsf-1(sy441)	Lycorine	100	32	6.24e-05	13.56	52	Day1	70821
25	N2	1DMSO	0	0		17.52	64	Day1	70821
26	N2	Anisomycin	3	-7	0.0504747	16.24	62	Day1	70821
27	N2	Anisomycin	10	2	0.665316	17.8	44	Day1	70821
28	N2	Anisomycin	33	4	0.715655	18.16	62	Day1	70821
29	N2	Anisomycin	50	6	0.389898	18.58	53	Day1	70821
30	N2	Anisomycin	100	8	0.192889	19	47	Day1	70821
31	hsf-1(sy441)	1DMSO	0	0		10.27	60	Day1	70821
32	hsf-1(sy441)	Anisomycin	3	19	0.0140092	12.21	48	Day1	70821
33	hsf-1(sy441)	Anisomycin	10	17	0.0128689	12.03	70	Day1	70821
34	hsf-1(sy441)	Anisomycin	33	11	0.110437	11.42	67	Day1	70821
35	hsf-1(sy441)	Anisomycin	50	25	0.0007682	12.85	55	Day1	70821
36	hsf-1(sy441)	Anisomycin	100	23	0.0013036	12.59	74	Day1	70821
37	N2	2DMSO	0	0		17.4	65	Day1	70821
38	N2	4E1RCat	3	11	0.0552877	19.34	74	Day1	70821
39	N2	4E1RCat	10	15	0.0026024	20	54	Day1	70821
40	N2	4E1RCat	33	25	0.0001546	21.7	56	Day1	70821
41	N2	4E1RCat	50	32	4.14e-06	22.9	30	Day1	70821
42	N2	4E1RCat	100	23	2.42e-05	21.47	58	Day1	70821
43	hsf-1(sy441)	2DMSO	0	0		11.08	76	Day1	70821
44	hsf-1(sy441)	4E1RCat	3	1	0.997686	11.18	61	Day1	70821
45	hsf-1(sy441)	4E1RCat	10	-2	0.717243	10.81	59	Day1	70821
46	hsf-1(sy441)	4E1RCat	33	5	0.588327	11.62	66	Day1	70821
47	hsf-1(sy441)	4E1RCat	50	1	0.986158	11.17	48	Day1	70821
48	hsf-1(sy441)	4E1RCat	100	3	0.528764	11.38	69	Day1	70821
