# Supplementary material for: Proteostasis is differentially modulated by inhibition of translation initiation or elongation
Source: eLife journal article supplement (doi:10.7554/elife.76465), 2023-10-05
Supplement: fig6-data5 [file elife-76465-fig6-data5-v2.zip]

Puromycin

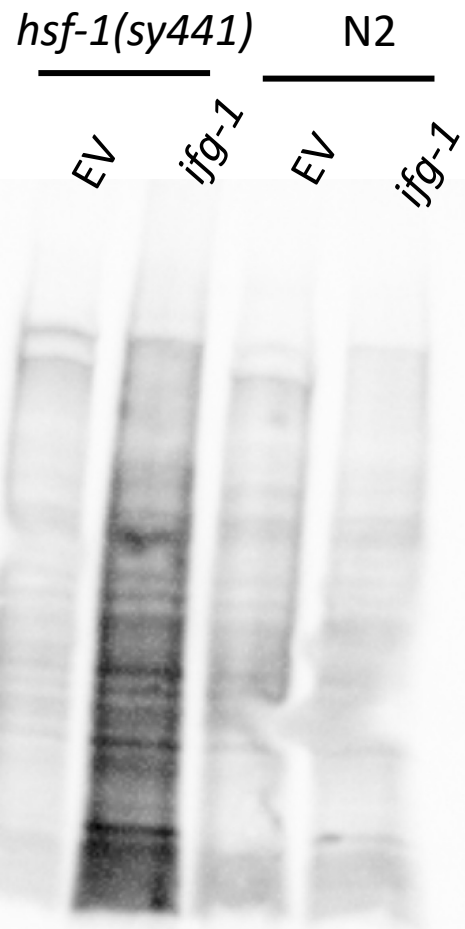

GAPDH (low exp)

*hsf-1(sy441)*      N2

EV    *ifg-1*    EV    *ifg-1*

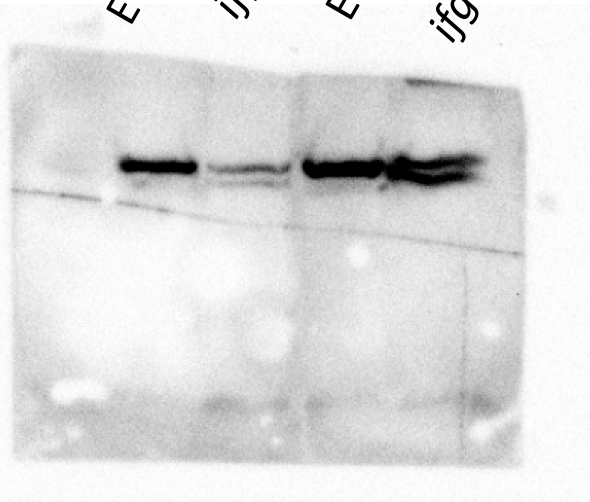

GAPDH (high exp)

*hsf-1(sy441)*      N2

EV    *ifg-1*    EV    *ifg-1*

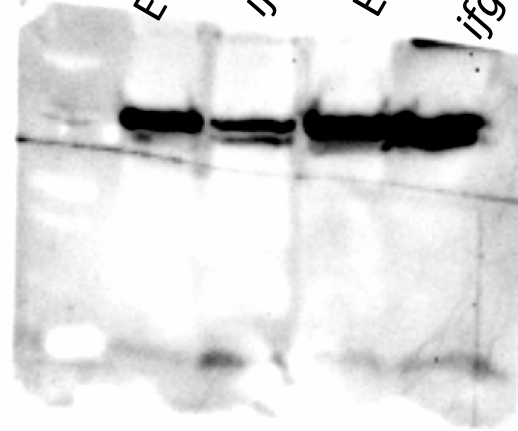

*hsf-1(sy441)*      N2

EV    *ifg-1*    EV    *ifg-1*

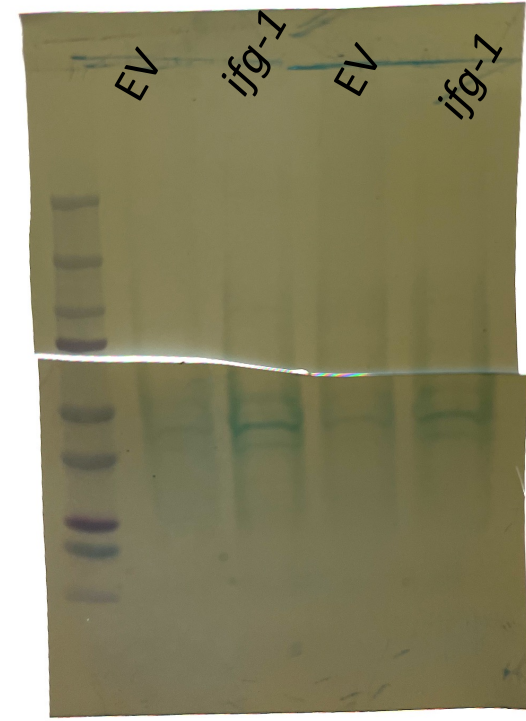

Coomassie

Puromycin

| <i>hsf-1(sy441)</i> |              | N2 |              |
|---------------------|--------------|----|--------------|
| EV                  | <i>ifg-1</i> | EV | <i>ifg-1</i> |

GAPDH (high exp)

| <i>hsf-1(sy441)</i> |              | N2 |              |
|---------------------|--------------|----|--------------|
| EV                  | <i>ifg-1</i> | EV | <i>ifg-1</i> |

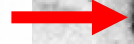

| <i>hsf-1(sy441)</i> |              | N2 |              |
|---------------------|--------------|----|--------------|
| EV                  | <i>ifg-1</i> | EV | <i>ifg-1</i> |

Coomassie

Puromycin

n2 n2 hsf-1 hsf-1

ev ifg-1 ev ifg-1

GAPDH (high exp)

N2 *hsf-1(sy441)*  
EV *ifg-1* EV *ifg-1*

N2 *hsf-1(sy441)*  
EV *ifg-1* EV *ifg-1*

Coomassie
