# Supplementary material for: Proteostasis is differentially modulated by inhibition of translation initiation or elongation
Source: eLife. 2023 Oct 5;12:e76465. doi: 10.7554/eLife.76465 (PMC10581687; doi:10.7554/eLife.76465)
Supplement: Supplementary file 1. — All experiments were conducted with dead, γ-irradiated bacteria (OP50) and conducted in a 96-well liquid culture. [file elife-76465-supp1.xlsx]

## Sheet: Sheet1
Id_number	Strain	Drug	Concentration (uM)	Percent Increase	pValue	Average Lifespan	Number of animals	Day of adulthood added	Experiment Date	Plate Number
1	N2	2DMSO	0	0		17.4	65	Day1	70821	1
2	N2	Salubrinal	3	28	7.75e-05	22.19	31	Day1	70821
3	N2	Salubrinal	10	28	8.16e-06	22.31	52	Day1	70821
4	N2	Salubrinal	33	42	1.74e-07	24.73	33	Day1	70821
5	N2	Salubrinal	50	37	9.62e-07	23.79	57	Day1	70821
6	N2	Salubrinal	100	38	4.39e-08	23.98	64	Day1	70821
7	hsf-1(sy441)	2DMSO	0	0		11.08	76	Day1	70821
8	hsf-1(sy441)	Salubrinal	3	3	0.588865	11.45	55	Day1	70821
9	hsf-1(sy441)	Salubrinal	10	7	0.3425	11.88	52	Day1	70821
10	hsf-1(sy441)	Salubrinal	33	5	0.370211	11.63	52	Day1	70821
11	hsf-1(sy441)	Salubrinal	50	10	0.21843	12.14	59	Day1	70821
12	hsf-1(sy441)	Salubrinal	100	-1	0.994566	11	51	Day1	70821
13	N2	1DMSO	0	0		17.52	64	Day1	70821	2
14	N2	Lycorine	3	10	0.11221	19.19	37	Day1	70821
15	N2	Lycorine	10	3	0.816785	18.05	56	Day1	70821
16	N2	Lycorine	33	2	0.94953	17.87	45	Day1	70821
17	N2	Lycorine	50	1	0.958985	17.62	60	Day1	70821
18	N2	Lycorine	100	3	0.388319	17.96	54	Day1	70821
19	hsf-1(sy441)	1DMSO	0	0		10.27	60	Day1	70821
20	hsf-1(sy441)	Lycorine	3	24	0.0037054	12.7	43	Day1	70821
21	hsf-1(sy441)	Lycorine	10	25	0.0007356	12.84	57	Day1	70821
22	hsf-1(sy441)	Lycorine	33	17	0.0268816	11.97	62	Day1	70821
23	hsf-1(sy441)	Lycorine	50	13	0.0656569	11.59	63	Day1	70821
24	hsf-1(sy441)	Lycorine	100	32	6.24e-05	13.56	52	Day1	70821
25	N2	1DMSO	0	0		17.52	64	Day1	70821	3
26	N2	Anisomycin	3	-7	0.0504747	16.24	62	Day1	70821
27	N2	Anisomycin	10	2	0.665316	17.8	44	Day1	70821
28	N2	Anisomycin	33	4	0.715655	18.16	62	Day1	70821
29	N2	Anisomycin	50	6	0.389898	18.58	53	Day1	70821
30	N2	Anisomycin	100	8	0.192889	19	47	Day1	70821
31	hsf-1(sy441)	1DMSO	0	0		10.27	60	Day1	70821
32	hsf-1(sy441)	Anisomycin	3	19	0.0140092	12.21	48	Day1	70821
33	hsf-1(sy441)	Anisomycin	10	17	0.0128689	12.03	70	Day1	70821
34	hsf-1(sy441)	Anisomycin	33	11	0.110437	11.42	67	Day1	70821
35	hsf-1(sy441)	Anisomycin	50	25	0.0007682	12.85	55	Day1	70821
36	hsf-1(sy441)	Anisomycin	100	23	0.0013036	12.59	74	Day1	70821
37	N2	2DMSO	0	0		17.4	65	Day1	70821	4
38	N2	4E1RCat	3	11	0.0552877	19.34	74	Day1	70821
39	N2	4E1RCat	10	15	0.0026024	20	54	Day1	70821
40	N2	4E1RCat	33	25	0.0001546	21.7	56	Day1	70821
41	N2	4E1RCat	50	32	4.14e-06	22.9	30	Day1	70821
42	N2	4E1RCat	100	23	2.42e-05	21.47	58	Day1	70821
43	hsf-1(sy441)	2DMSO	0	0		11.08	76	Day1	70821
44	hsf-1(sy441)	4E1RCat	3	1	0.997686	11.18	61	Day1	70821
45	hsf-1(sy441)	4E1RCat	10	-2	0.717243	10.81	59	Day1	70821
46	hsf-1(sy441)	4E1RCat	33	5	0.588327	11.62	66	Day1	70821
47	hsf-1(sy441)	4E1RCat	50	1	0.986158	11.17	48	Day1	70821
48	hsf-1(sy441)	4E1RCat	100	3	0.528764	11.38	69	Day1	70821
49	N2	1DMSO	0			15.83	53	Day1	61721	5
50	N2	Anisomycin	3	4	0.643999	16.46	65	Day1	61721
51	N2	Anisomycin	10	9	0.16149	17.22	50	Day1	61721
52	N2	Anisomycin	33	9	0.129217	17.22	58	Day1	61721
53	N2	Anisomycin	50	6	0.408588	16.76	46	Day1	61721
54	N2	Anisomycin	100	21	0.0022927	19.16	37	Day1	61721
55	N2	Lycorine	3	6	0.364856	16.71	56	Day1	61721
56	N2	Lycorine	10	10	0.0896744	17.38	60	Day1	61721
57	N2	Lycorine	33	9	0.225218	17.25	53	Day1	61721
58	N2	Lycorine	50	10	0.098865	17.45	56	Day1	61721
59	N2	Lycorine	100	18	0.0018667	18.74	69	Day1	61721
60	N2	3DMSO	0			16.97	65	Day1	61721	6
61	N2	4E1RCat	3	-2	0.699256	16.55	62	Day1	61721
62	N2	4E1RCat	10	13	0.0028717	19.22	67	Day1	61721
63	N2	4E1RCat	33	20	3.69e-05	20.32	56	Day1	61721
64	N2	4E1RCat	50	26	1.4e-06	21.31	61	Day1	61721
65	N2	4E1RCat	100	33	1.9e-10	22.53	79	Day1	61721
66	N2	Salubrinal	3	4	0.262753	17.72	76	Day1	61721
67	N2	Salubrinal	10	8	0.0839774	18.28	54	Day1	61721
68	N2	Salubrinal	33	18	0.0005294	20.04	49	Day1	61721
69	N2	Salubrinal	50	13	0.0035598	19.23	61	Day1	61721
70	N2	Salubrinal	100	5	0.2797	17.76	41	Day1	61721
71	hsf-1(sy441)	1DMSO	0			14.13	47	Day1	61021	7
72	hsf-1(sy441)	Anisomycin	3	16	0.0154231	16.44	54	Day1	61021
73	hsf-1(sy441)	Anisomycin	10	16	0.0129763	16.37	63	Day1	61021
74	hsf-1(sy441)	Anisomycin	33	15	0.0264301	16.27	49	Day1	61021
75	hsf-1(sy441)	Anisomycin	50	13	0.0540627	15.96	56	Day1	61021
76	hsf-1(sy441)	Anisomycin	100	13	0.0373801	16	57	Day1	61021
77	hsf-1(sy441)	Lycorine	3	21	0.0028759	17.09	46	Day1	61021
78	hsf-1(sy441)	Lycorine	10	20	0.0040296	16.96	49	Day1	61021
79	hsf-1(sy441)	Lycorine	33	11	0.140331	15.7	30	Day1	61021
80	hsf-1(sy441)	Lycorine	50	11	0.126828	15.68	40	Day1	61021
81	hsf-1(sy441)	Lycorine	100	15	0.0241796	16.25	57	Day1	61021
82	hsf-1(sy441)	2DMSO	0			14.26	58	Day1	61021	8
83	hsf-1(sy441)	4E1RCat	3	-2	0.830084	14.02	54	Day1	61021
84	hsf-1(sy441)	4E1RCat	10	-3	0.603946	13.8	45	Day1	61021
85	hsf-1(sy441)	4E1RCat	33	2	0.70297	14.61	74	Day1	61021
86	hsf-1(sy441)	4E1RCat	50	0	0.970137	14.21	53	Day1	61021
87	hsf-1(sy441)	4E1RCat	100	9	0.144266	15.57	56	Day1	61021
88	hsf-1(sy441)	Salubrinal	3	9	0.146342	15.56	59	Day1	61021
89	hsf-1(sy441)	Salubrinal	10	5	0.429188	15.02	44	Day1	61021
90	hsf-1(sy441)	Salubrinal	33	9	0.118075	15.54	61	Day1	61021
91	hsf-1(sy441)	Salubrinal	50	14	0.0448828	16.19	58	Day1	61021
92	hsf-1(sy441)	Salubrinal	100	7	0.304941	15.22	54	Day1	61021
93	ifg-1(cxTi9279)	1DMSO	0			21.47	172	Day1	11723	9
94	ifg-1(cxTi9279)	4E1RCat	100	-1	0.782447	21.19	94	Day1	11723
95	hsf-1(sy441)	1DMSO	0			7.76	54	Day1	11723	10
96	hsf-1(sy441)	4E1RCat	100	7	0.41683	8.33	55	Day1	11723
97	hsf-1(sy441)	Anisomycin	100	28	0.037679	9.9	68	Day1	11723
98	hsf-1(sy441)	Cycloheximide	100	23	0.0406175	9.51	70	Day1	11723
99	N2	1DMSO	0			17.84	57	Day1	11723
100	N2	4E1RCat	100	20	0.0162339	21.4	60	Day1	11723
101	N2	Anisomycin	100	-4	0.412259	17.08	66	Day1	11723
102	N2	Cycloheximide	100	4	0.94294	18.54	67	Day1	11723
103	hsf-1(sy441)	1DMSO	0			8.35	66	Day1	11723	11
104	hsf-1(sy441)	4E1RCat	100	2	0.734767	8.5	46	Day1	11723
105	hsf-1(sy441)	Anisomycin	100	24	0.0263826	10.33	60	Day1	11723
106	hsf-1(sy441)	Cycloheximide	100	13	0.131611	9.46	83	Day1	11723
107	N2	1DMSO	0			18.1	60	Day1	11723
108	N2	4E1RCat	100	20	0.0009414	21.68	73	Day1	11723
109	N2	Anisomycin	100	-5	0.267079	17.23	62	Day1	11723
110	N2	Cycloheximide	100	-2	0.970229	17.71	72	Day1	11723
111	N2	1DMSO	0			17.95	55	Day1	11723	12
112	N2	4E1RCat	100	27	1.88e-06	22.74	58	Day1	11723
113	N2	Anisomycin	100	1	0.618573	18.17	63	Day1	11723
114	N2	Cycloheximide	100	-3	0.737562	17.43	79	Day1	11723
115	N2	Lycorine	100	-3	0.812385	17.43	61	Day1	11723
116	N2	Salubrinal	100	24	4.82e-05	22.25	61	Day1	11723
117	ifg-1(cxTi9279)	1DMSO	100			25.36	161	Day1	31023	13
118	ifg-1(cxTi9279)	4E1RCat	100	0	0.680583	25.31	129	Day1	31023
119	ifg-1(cxTi9279)	1DMSO	90	-12	7.23e-07	22.44	157	Day1	31023
120	N2	1DMSO	0			22.44	157	Day1	31023
121	ifg-1(cxTi9279)	1DMSO	100	13	7.23e-07	25.36	161	Day1	31023
122	N2	4E1RCat	100	15	2.26e-06	25.77	167	Day1	31023
123	hsf-1(sy441)	1DMSO	0			11.02	115	Day1	71422	14
124	hsf-1(sy441)	4E1RCat	100	5	0.115534	11.6	43	Day1	71422
125	hsf-1(sy441)	Anisomycin	100	9	0.037031	12	66	Day1	71422
126	N2	1DMSO	0			18.09	129	Day1	71422	15
127	N2	4E1RCat	100	19	4.88e-07	21.59	73	Day1	71422
128	N2	Anisomycin	100	-5	0.0656733	17.19	62	Day1	71422
129	N2	2DMSO	0			18.68	120	Day1	71422	16
130	N2	4E1RCat	100	21	1.84e-10	22.56	125	Day1	71422
131	N2	Anisomycin	100	-3	0.320786	18.13	135	Day1	71422
132	hsf-1(sy441)	1DMSO	0			10	45	Day1	100721	17
133	hsf-1(sy441)	Anisomycin	10	9	0.472617	10.86	65	Day1	100721
134	hsf-1(sy441)	Anisomycin	100	23	0.0470275	12.34	59	Day1	100721
135	hsf-1(sy441)	Lycorine	10	24	0.0155512	12.45	58	Day1	100721
136	hsf-1(sy441)	Lycorine	100	14	0.297094	11.41	46	Day1	100721
137	hsf-1(sy441)	2DMSO	0			10.43	44	Day1	100721	18
138	hsf-1(sy441)	4E1RCat	10	-6	0.352682	9.8	55	Day1	100721
139	hsf-1(sy441)	4E1RCat	100	-8	0.301838	9.59	61	Day1	100721
140	hsf-1(sy441)	Salubrinal	10	7	0.406255	11.15	53	Day1	100721
141	hsf-1(sy441)	Salubrinal	100	8	0.345154	11.25	44	Day1	100721
142	N2	1DMSO	0			16	54	Day1	D1	19
143	N2	Anisomycin	100	-1	0.903197	15.83	52	Day1	D1
144	N2	Cycloheximide	100	-1	0.932139	15.84	51	Day1	D1
145	N2	Lycorine	100	1	0.75383	16.1	52	Day1	D1
146	hsf-1(sy441)	1DMSO	0			10.96	52	Day1	D1
147	hsf-1(sy441)	Anisomycin	100	16	0.0254311	12.72	50	Day1	D1
148	hsf-1(sy441)	Cycloheximide	100	15	0.0267846	12.61	54	Day1	D1
149	hsf-1(sy441)	Lycorine	100	17	0.0094651	12.87	54	Day1	D1
150	N2	3DMSO	0			15.48	52	Day1	D1	20
151	N2	4E1RCat	100	49	3.39e-08	23.14	51	Day1	D1
152	hsf-1(sy441)	3DMSO	0			10.17	53	Day1	D1
153	hsf-1(sy441)	4E1RCat	100	10	0.102892	11.18	60	Day1	D1
154	N2	4DMSO	0			16.51	53	Day1	D1	21
155	N2	Salubrinal	100	27	2.68e-05	21.04	51	Day1	D1
156	hsf-1(sy441)	4DMSO	100			11.04	55	Day1	D1
157	hsf-1(sy441)	Salubrinal	100	5	0.53865	11.54	54	Day1	D1
